# Supplementary material for: Unlocking the Black Box beyond Bayesian Global Optimization for Materials Design using Reinforcement Learning
Source: Research Square preprint supplement (doi:10.21203/rs.3.rs-5650305/v1), 2025-04-28
Supplement: Supplementary file 1 [file 4d4c0569d23b32ebc8401767.docx]

| **Table 2** Algorithm: Model-based DQN for Materials Design |
| --- |
| 1. Input: Design space *X*, initial dataset *D*0, GPR surrogate model *M*, DQN agent *A*, RL training episode *N*, episode length *L* (number of design decisions/actions† per episode), Batch size *Btrain* for Q-network update, Optimization type: minimization 2. Output: Best material design *x** 3. Initialize GPR surrogate model *M* with *D*0, *D* = *D*0 4. Initialize DQN with Q-network *Q*(*s*, *a*) 5. Initialize replay buffer *R* 6. while not terminated do // Until max iterations or target performance met 7. Train/Update GPR model *M* using *D* 8. // Agent training stage: learn from surrogate model; train DQN for *N* episodes 9. for episode = 1 to *N* do // Training budget for DQN agent 10. *s* = get_initial_state() // Initialize with predefined or random state 11. for step = 1 to *L* do // Make L sequential design decisions/actions 12. a = ε-greedy(*Q*(*s*,·), *X*) // Select action within design space 13. *s'* = next_state(*s*, *a*) // State transition from *s* to *s'* 14. *r* = *M*(*s*) - *M*(*s'*) // Get reward using GPR, assuming minimization 15. Store (*s*, *a*, *r*, *s'*) in *R* 16. Update *Q*(*s*, *a*) using a random batch of *Btrain* (*s*, *a*, *r*, *s'*) tuples from *R* 17. *s* = *s'* 18. end for 19. end for 20. // Design stage: propose and evaluate one new material design‡ 21. *s* = get_initial_state() // Initialize with predefined or random state 22. for step = 1 to *L* do // Make L sequential design decisions/actions 23. a = ε-greedy(*Q*(*s*,·), *X*) // Propose materials design action 24. *s'* = next_state(*s*, *a*) // State transition from *s* to *s'* 25. *s* = *s'* 26. end for 27. *x*next = *s* 28. *y*next = *f*(*x*next) // Evaluate the new design 29. *D* = *D* ∪ {(*x*next, *y*next)} // Update dataset with experiment results 30. end while 31. return *x** = argmax *x*∈D *f*(*x*) |

Note: † "Design decisions/actions" refer to the actions taken to select element compositions for one material design. ‡ The term "material design" refers to obtaining one specific alloy composition.
