# Supplementary material for: Unlocking the Black Box beyond Bayesian Global Optimization for Materials Design using Reinforcement Learning
Source: Research Square preprint supplement (doi:10.21203/rs.3.rs-5650305/v1), 2025-04-28
Supplement: Supplementary file 2 [file eabcc248814fcc2aff8b5956.docx]

| **Table 1** Algorithm: Bayesian Optimization |
| --- |
| 1. Input: Design space *X*, initial dataset *D*0, GPR surrogate model *M*, acquisition function *α* 2. Output: Best material design *x** 3. Initialize GPR surrogate model *M* with *D*0, *D* = *D*0 4. while not terminated do // Until max iterations or target performance met 5. Train/Update GPR surrogate model *M* using *D* 6. *x*next = *argmax**x*∈*X* *α*(*x*; *M*) // Inner optimization 7. *y*next = *f*(*x*next) // Evaluate design 8. *D* = *D* ∪ {(*x*next, *y*next)} // Update dataset with experiment results 9. end while 10. return *x** = argmax *x*∈D *f*(*x*) |
